# Supplementary material
Source: PubMed Central journal article supplement (PMC9253196)
Supplement: NIHMS1768897-supplement-1.pdf [file NIHMS1768897-supplement-1.pdf]

**Supplementary Table I. Prespecified Renal Endpoint Definitions**

| <b>Endpoint</b>                | <b>Criteria</b>                                                                                                                                                                                                                                                                                                                                                                                                                                                                                                                                                                                                                                                                                                                                                                                                     |
|--------------------------------|---------------------------------------------------------------------------------------------------------------------------------------------------------------------------------------------------------------------------------------------------------------------------------------------------------------------------------------------------------------------------------------------------------------------------------------------------------------------------------------------------------------------------------------------------------------------------------------------------------------------------------------------------------------------------------------------------------------------------------------------------------------------------------------------------------------------|
| <b>End-stage renal disease</b> | <p>One of the following:</p> <p>a) Initiation of dialysis (e.g., hemodialysis, peritoneal dialysis, or continuous veno-venous hemodialysis), continuing for <math>\geq 30</math> days without known recovery of renal function, Sites were queried to provide evidence of continuation of dialysis for over 90 days.</p> <p>b) Initiation of dialysis with death before 30 days (excludes dialysis events associated with acute kidney injury with death before 30 days)</p> <p>c) A drop in eGFR from baseline (randomization, i.e. Visit 199/201) to a value <math>&lt;15</math> mL/min/1.73m<sup>2</sup> on two consecutive central laboratory measurements separated by <math>\geq 30</math> days. This event was identified programmatically by the sponsor</p> <p>d) Occurrence of kidney transplantation</p> |

|                                 |                                                                                                                                                                                                                                                                                                                                                                                                |
|---------------------------------|------------------------------------------------------------------------------------------------------------------------------------------------------------------------------------------------------------------------------------------------------------------------------------------------------------------------------------------------------------------------------------------------|
| <b>Worsening Renal Function</b> | <p>Sustained reduction in estimated GFR (eGFR) by 50% from baseline (Randomization, Visit 199/201) as determined by 2 consecutive post-baseline central laboratory measurements separated by &gt; 30 days.</p> <p>This event was identified programmatically by the sponsor.</p>                                                                                                               |
| <b>Death from Renal Causes</b>  | <p>Death occurring from complications of renal failure (e.g. hyperkalemia, uremia, acidosis) after a patient refuses or a physician withholds renal replacement therapy (i.e. initiation of chronic dialysis or renal transplantation) or in cases where dialysis is unavailable.</p> <p>Such events were adjudicated as renal death only when another cause of death was not adjudicated.</p> |

**Supplementary Table 2. Characteristics of the Patients at Baseline, According to Categories of Estimated Glomerular Filtration Rate (eGFR).\***

| Characteristic                            | eGFR ≥60<br>ml/min/1.73m <sup>2</sup><br>(N=7,792) | eGFR ≥45 to <60<br>ml/min/1.73m <sup>2</sup><br>(N=3,584) | eGFR <45<br>ml/min/1.73m <sup>2</sup><br>(N=1,818) | P      |
|-------------------------------------------|----------------------------------------------------|-----------------------------------------------------------|----------------------------------------------------|--------|
| Age, yrs                                  | 64 ± 11                                            | 70 ± 10                                                   | 73 ± 9                                             | <0.001 |
| Female, no. (%)                           | 2210 (28)                                          | 1307 (36)                                                 | 794 (44)                                           | <0.001 |
| Race, no. (%)                             |                                                    |                                                           |                                                    | <0.001 |
| White                                     | 5269 (68)                                          | 2728 (76)                                                 | 1454 (80)                                          |        |
| Black                                     | 385 (5)                                            | 104 (3)                                                   | 41 (2)                                             |        |
| Asian                                     | 1432 (18)                                          | 479 (13)                                                  | 204 (11)                                           |        |
| Other                                     | 706 (9)                                            | 273 (8)                                                   | 119 (7)                                            |        |
| Geographic Region, no. (%)                |                                                    |                                                           |                                                    | <0.001 |
| North America                             | 499 (6)                                            | 407 (11)                                                  | 255 (14)                                           |        |
| Latin America                             | 1134 (15)                                          | 462 (13)                                                  | 207 (11)                                           |        |
| Western Europe                            | 1791 (23)                                          | 1024 (29)                                                 | 625 (34)                                           |        |
| Central Europe                            | 2865 (37)                                          | 1175 (33)                                                 | 501 (28)                                           |        |
| Asia-Pacific or other                     | 1503 (19)                                          | 516 (14)                                                  | 230 (13)                                           |        |
| Systolic blood pressure, mmHg             | 125 ± 16                                           | 124 ± 16                                                  | 125 ± 16                                           | 0.22   |
| Heart rate, beats/min                     | 72 ± 12                                            | 71 ± 12                                                   | 71 ± 12                                            | <0.001 |
| Body-mass index <sup>#</sup>              | 28.7 ± 5.5                                         | 29.0 ± 5.3                                                | 29.5 ± 5.3                                         | <0.001 |
| Serum creatinine, mg/dL <sup>§</sup>      | 0.9 ± 0.2                                          | 1.2 ± 0.2                                                 | 1.6 ± 0.3                                          | <0.001 |
| eGFR, % mL/min/1.73 m <sup>2</sup>        | 78 ± 16                                            | 53 ± 4                                                    | 38 ± 5                                             | <0.001 |
| <b>Clinical features of heart failure</b> |                                                    |                                                           |                                                    |        |
| Ischemic Cause, no. (%)                   | 3935 (51)                                          | 1894 (53)                                                 | 930 (51)                                           | 0.06   |

|                                                                             |                  |                  |                  |        |
|-----------------------------------------------------------------------------|------------------|------------------|------------------|--------|
| <b>Left ventricular ejection fraction, %</b>                                | 38.2 ± 14.5      | 41.0 ± 15.5      | 43.5 ± 16.1      | <0.001 |
| <b>Median NT-proBNP (25<sup>th</sup>-75<sup>th</sup> percentile), pg/mL</b> | 1198 [659, 2243] | 1415 [760, 2703] | 1640 [830, 3178] | <0.001 |
| <b>NYHA Classification, no. (%)</b>                                         |                  |                  |                  | <0.001 |
| <b>I</b>                                                                    | 339 (4)          | 129 (4)          | 58 (3)           |        |
| <b>II</b>                                                                   | 5764 (74)        | 2609 (73)        | 1251 (69)        |        |
| <b>III</b>                                                                  | 1629 (21)        | 825 (23)         | 496 (27)         |        |
| <b>IV</b>                                                                   | 52 (1)           | 16 (0)           | 11 (1)           |        |
| <b>Medical History, no. (%)</b>                                             |                  |                  |                  |        |
| <b>Hypertension</b>                                                         | 5942 (76)        | 2993 (84)        | 1588 (87)        | <0.001 |
| <b>Diabetes</b>                                                             | 2736 (35)        | 1386 (39)        | 846 (47)         | <0.001 |
| <b>Atrial fibrillation or flutter</b>                                       | 2485 (32)        | 1414 (40)        | 744 (41)         | <0.001 |
| <b>Stroke</b>                                                               | 613 (8)          | 361 (10)         | 259 (14)         | <0.001 |
| <b>Hospitalization for heart failure</b>                                    | 4494 (58)        | 2044 (57)        | 1042 (57)        | 0.81   |
| <b>Myocardial infarction</b>                                                | 2702 (35)        | 1354 (38)        | 661 (36)         | 0.005  |
| <b>Treatment, no. (%)</b>                                                   |                  |                  |                  |        |
| <b>Diuretic at randomization</b>                                            | 6479 (83)        | 3153 (88)        | 1690 (93)        | <0.001 |
| <b>ACE inhibitor or ARB at screening</b>                                    | 7476 (96)        | 3373 (94)        | 1669 (92)        | <0.001 |
| <b>Mineralocorticoid-receptor antagonist at randomization</b>               | 3664 (47)        | 1521 (42)        | 725 (40)         | <0.001 |
| <b>Beta-blocker at randomization</b>                                        | 6966 (89)        | 3096 (86)        | 1569 (86)        | <0.001 |
| <b>Sacubitril/valsartan, n (%)</b>                                          | 3889 (50)        | 1810 (51)        | 895 (49)         | 0.67   |

\* Plus-minus values are mean +/- SD.

# The body-mass index is the weight in kilograms divided by the square of the height in meters.

<sup>§</sup> This characteristic was measured at the randomization visit instead of the screening visit.

<sup>%</sup> The GFR at baseline was estimated according to the four-variable Modification of Diet in Renal Disease formula.

NYHA, New York Heart Association; BMI, Body Mass Index; ACE, Angiotensin Converting Enzyme; ARB, Angiotensin Receptor Blocker

Supplementary Table 3. Baseline Characteristics according to parent trial

| Characteristic                                                          | PARADIGM-HF<br>(N=8,399) | PARAGON-HF<br>(N=4,796) |
|-------------------------------------------------------------------------|--------------------------|-------------------------|
| Age, yrs                                                                | 64 ± 11                  | 73 ± 8                  |
| Female, no. (%)                                                         | 1832 (22)                | 2479 (52)               |
| Race, no. (%)                                                           |                          |                         |
| White                                                                   | 5544 (64)                | 3907 (81)               |
| Black                                                                   | 428 (5)                  | 102 (2)                 |
| Asian                                                                   | 1509 (18)                | 607 (13)                |
| Other                                                                   | 918 (11)                 | 180 (4)                 |
| Geographic Region, no. (%)                                              |                          |                         |
| North America                                                           | 602 (7)                  | 559 (12)                |
| Latin America                                                           | 1433 (17)                | 370 (8)                 |
| Western Europe                                                          | 2051 (24)                | 1390 (29)               |
| Central Europe                                                          | 2826 (34)                | 1115 (36)               |
| Asia-Pacific or other                                                   | 1487 (18)                | 762 (16)                |
| Systolic blood pressure, mmHg                                           | 121 ± 15                 | 131 ± 15                |
| Heart rate, beats/min                                                   | 72 ± 12                  | 70 ± 12                 |
| Body-mass index <sup>#</sup>                                            | 28.2 ± 5.5               | 30.2 ± 5.0              |
| Serum creatinine, mg/dL <sup>§</sup>                                    | 1.1 ± 0.3                | 1.1 ± 0.3               |
| eGFR, % mL/min/1.73 m <sup>2</sup>                                      | 68 ± 20                  | 63 ± 19                 |
| <b>Clinical features of heart failure</b>                               |                          |                         |
| Ischemic Cause, no. (%)                                                 | 5036 (60)                | 1723 (36)               |
| Left ventricular ejection fraction, %                                   | 29.5 ± 6.2               | 57.5 ± 7.9              |
| Median NT-proBNP (25 <sup>th</sup> -75 <sup>th</sup> percentile), pg/mL | 1612 [886, 3224]         | 911 [464, 1613]         |
| NYHA Classification, no. (%)                                            |                          |                         |
| I                                                                       | 389 (5)                  | 137 (3)                 |
| II                                                                      | 5919 (71)                | 3706 (77)               |
| III                                                                     | 2018 (24)                | 932 (19)                |
| IV                                                                      | 60 (1)                   | 19 (0)                  |
| <b>Medical History, no. (%)</b>                                         |                          |                         |
| Hypertension                                                            | 5940 (71)                | 4584 (96)               |
| Diabetes                                                                | 2907 (35)                | 2062 (43)               |
| Atrial fibrillation or flutter                                          | 3091 (37)                | 1552 (32)               |
| Stroke                                                                  | 725 (9)                  | 508 (11)                |
| Hospitalization for heart failure                                       | 5274 (63)                | 2306 (48)               |
| Myocardial infarction                                                   | 3634 (43)                | 1083 (23)               |
| <b>Treatment, no. (%)</b>                                               |                          |                         |

|                                                               |            |           |
|---------------------------------------------------------------|------------|-----------|
| <b>Diuretic at randomization</b>                              | 6738 (80)  | 4585 (96) |
| <b>ACE inhibitor or ARB at screening</b>                      | 8379 (100) | 4139 (86) |
| <b>Mineralocorticoid-receptor antagonist at randomization</b> | 4671 (56)  | 1239 (26) |
| <b>Beta-blocker at randomization</b>                          | 7811 (93)  | 3821 (80) |
| <b>Sacubitril/valsartan, n (%)</b>                            | 4187 (50)  | 2407 (50) |

\* Plus-minus values are mean +/- SD.

# The body-mass index is the weight in kilograms divided by the square of the height in meters.

§ This characteristic was measured at the randomization visit instead of the screening visit.

% The GFR at baseline was estimated according to the four-variable Modification of Diet in Renal Disease formula.

NYHA, New York Heart Association; BMI, Body Mass Index; ACE, Angiotensin Converting Enzyme; ARB, Angiotensin Receptor Blocker

**Supplementary Figure 1. Incidence rates of the renal composite outcome according to baseline ejection fraction**



**Supplementary Figure 2. Subgroup analyses of the treatment effect on difference in rate of eGFR decline (mL/min/1.72 m<sup>2</sup> with 95% confidence intervals)**
